# Supplementary material for: DNA-based strategies for blocking HMGB1 cytokine activity: design, synthesis and preliminary in vitro / in vivo assays of DNA and DNA-like duplexes
Source: Royal Society of Chemistry journal article supplement (doi:10.1039/c1mb05009e), 2011-03-22

**SUPPLEMENTARY MATERIAL (ESI) FOR MOLECULAR BIOSYSTEM**

**DNA-based strategies for blocking HMGB1 cytokine activity: design, synthesis  
and preliminary *in vitro/in vivo* assays of DNA and DNA-like duplexes**

Domenica Musumeci<sup>1\*</sup>, Enrico M. Bucci<sup>1</sup>, Giovanni N. Roviello<sup>1</sup>, Roberto Sapio<sup>2</sup>, Margherita Valente<sup>2</sup>, Maria Moccia<sup>1</sup>, Marco E. Bianchi<sup>3</sup> and Carlo Pedone<sup>1</sup>

<sup>1</sup> *Istituto di Biostrutture e Bioimmagini – CNR, via Mezzocannone 16, 80134 Napoli, Italy;*

<sup>2</sup> *Bionucleon Srl, via Ribes 5, 10010 Colletterto Giacosa (TO), Italy;*

<sup>3</sup> *DIBIT, San Raffaele University, via Olgettina 58, 20132 Milano, Italy.*

\* Correspondence should be addressed to Domenica Musumeci (domymusu@alice.it); via Mezzocannone 16, 80134 Napoli, Italy; Tel: +39-(0)81-2534585; Fax: +39-(0)81-2534574.

**Figure S1**

CD titration of *chim 2A* duplex with HMGB1.

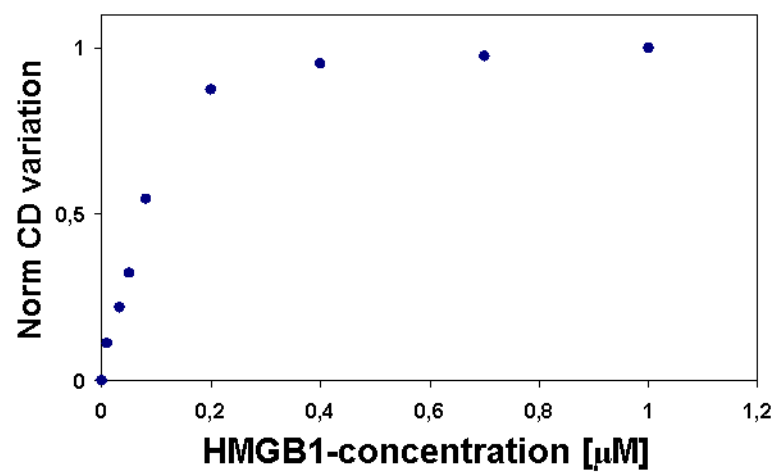

**Figure S2**

Chemotaxis assays: in treatments from 3 to 6, from 7 to 10 and from 11 to 14, increasing amounts (3, 10, 30 and 100 nM) of *chim2A* duplex, DNA 2A duplex, and chimeric single strand **f** were used.

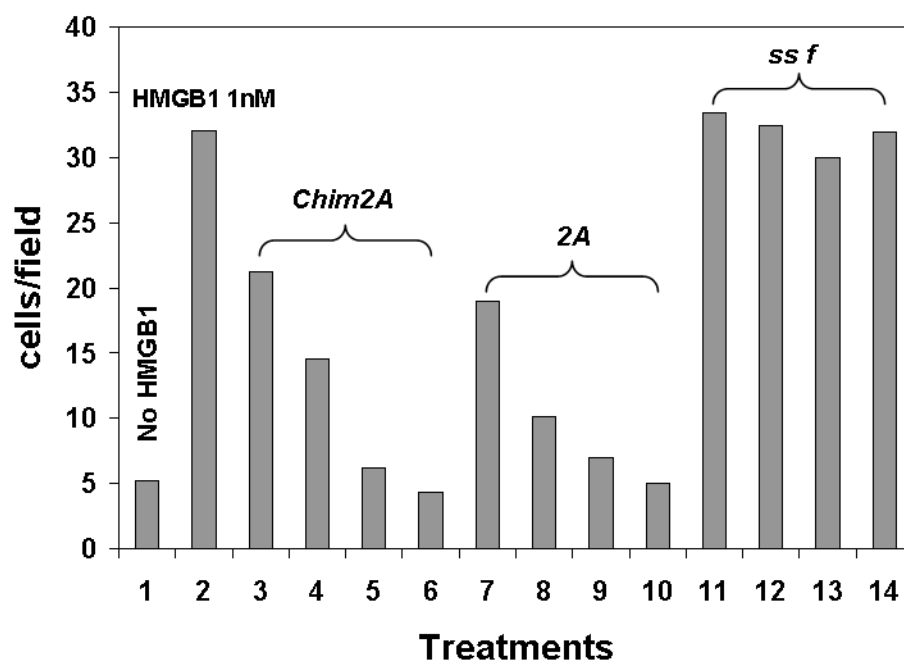

Supplement: c1mb05009e.pdf [file c1mb05009e.pdf]
